# Supplementary material for: Reconstruction, analysis, and segmentation of LA-ICP-MS imaging data using Python for the identification of sub-organ regions in tissues
Source: Royal Society of Chemistry journal article supplement (doi:10.1039/c9an02472g), 2020-01-01
Supplement: c9an02472g1.pdf [file c9an02472g1.pdf]

## RecSegImage-LA: Reconstruction, Segmentation of LA-ICP Imaging Data

```
In [10]: import sys
sys.path.append("../")

from recsegimage import *

import numpy as np
import matplotlib.pyplot as plt
import glob
import re
matplotlib inline
```

### Reconstruction of images for all the analyzed metals

The following lines of code perform image reconstruction of LA-ICP-MS data, save the data in the results folder and generate plots of the reconstructed images. The final images are in order of acquisition in the raw data (Metal1, Metal2, Metal3, ... , Metaln)

- foldername = string, name of the folder that includes the raw data files and the ipython script RecSegImage-LA.ipynb
- data\_name = string, name given to the data (no blank spaces allowed in the name)
- spot\_size = integer, spot size in microns of the laser used to acquire the data
- scan\_rate = integer, scan rate of the laser in microns/second
- nmetals = integer, number of metals analyzed, when performing the images
- ldiscard = integer, number of columns on the far left side of the image to be eliminated in case there is sample carryover. Default value is 0

```
In [11]: foldername = "data/"
data_name = "Example"
spot_size = 50
scan_rate = 15
nmetals = 4
ldiscard = 0

# Image reconstruction of the LA-ICP-MS raw data
final_matrices, sumdata = image_reconstruction(foldername, ldiscard, nmetals, spot_size, scan_rate)

# Save the analysis in .csv files in the folder RecSegImage-LA/results folder
write_data_analysis(final_matrices, ldiscard, sumdata, nmetals)

# Generate the image plots of all the analyzed metals
generate_plot_all_metals(final_matrices, nmetals)
```

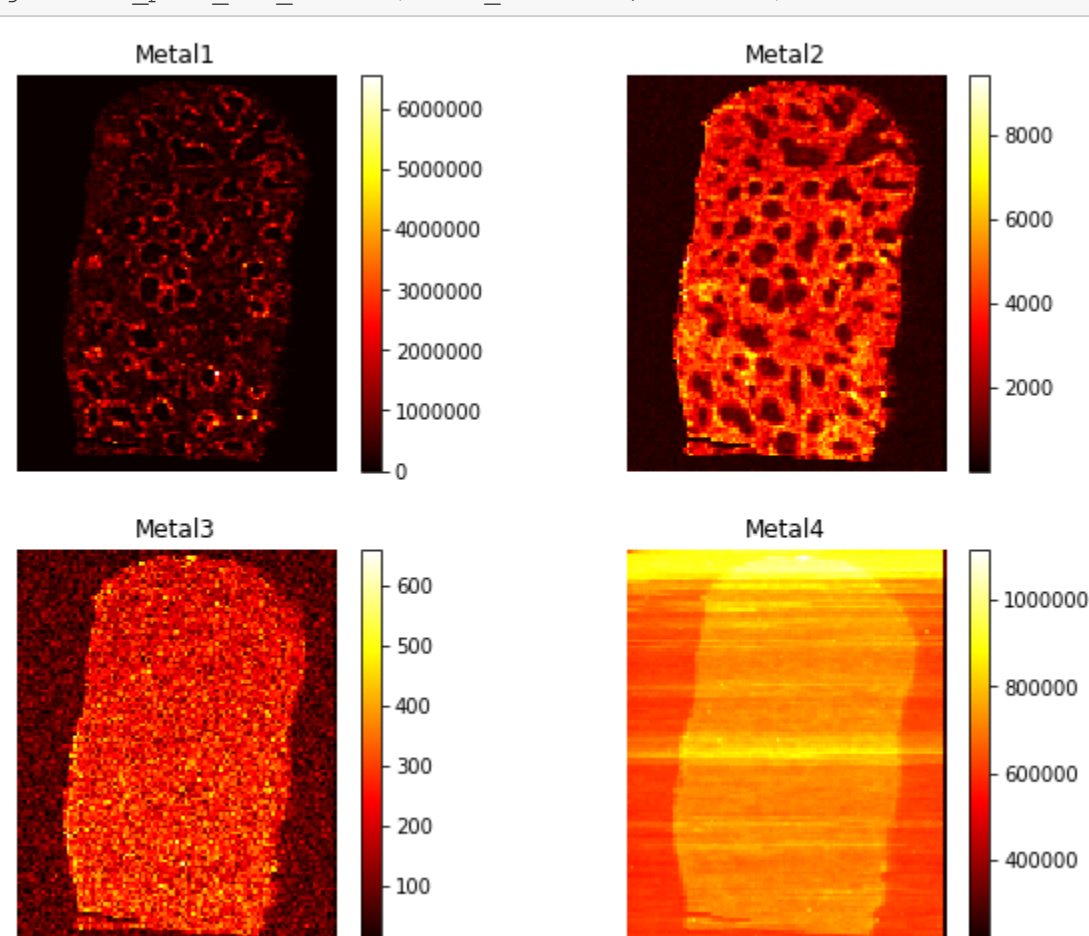

### Reconstruction of the image of a single metal

Image reconstruction of one of all the analyzed metals. The metal index of the metal needs to be specified. The metal index corresponds to the order in which the metal is analyzed by the ICP-MS. For this particular example, the ICP-MS performs the readings of the metals in the following order: Bi, Fe, Zn, S. This means that the associated indexes are: Bi (Metal1, metal\_index=1), Fe (Metal2, metal\_index=2), Zn (Metal3, metal\_index=3) and S (Metal4, metal\_index=4)

- metal\_index = integer, index of the metal that we want to plot. For example, for Metal 2 (Fe), the index is 2.

```
In [12]: metal_index = 2

# Functions to generate image of one metal plot
generate_metal_plot(final_matrices, metal_index, nmetals)
```

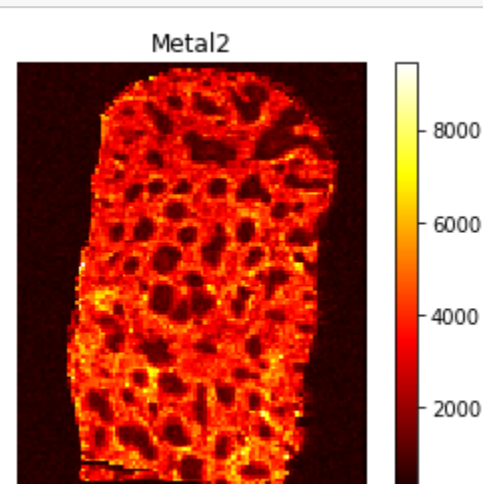

### Background Subtraction

Use the Zn image (or other metal that marks the tissue boundary) to differentiate tissue from background

- background\_index = integer, index of the image used for background subtraction. In this case is the Zn image
- line = integer, row or column from which the standard deviation will be calculated. By default, the value is 1, which corresponds to the first row and column. The script will calculate the smallest standard deviation among the selected rows and columns
- std\_threshold = integer, how many standard deviations will be tolerated to set the threshold of what is considered to be tissue and background

```
In [13]: background_index = 3
line = 1
std_threshold = 4

background_mask = remove_background(final_matrices, background_index, line, std_threshold)
background_plot = generate_background_plot(background_mask)
```

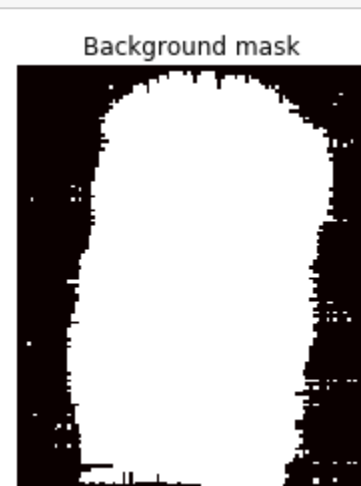

### Normalization with background subtraction

Normalization of the image with background subtraction. Background subtraction should be done first to obtain the background mask. The normalization corresponds to a pixel/pixel division of the images, so metal\_numerator/metal\_denominator should be specified in the following parameters:

- metal\_numerator = integer, index of the metal that will correspond to the metal numerator in the division operation
- metal\_denominator = integer, index of the metal that will correspond to the metal denominator in the division operation

The normalized image with background subtraction is saved as a text file in the results folder. The name of the file is: "Normalization Background Metal\_numerator / Metal\_denominator"

```
In [14]: metal_numerator = 1
metal_denominator = 3

normalization_with_background(final_matrices, background_mask, metal_numerator, metal_denominator)
```

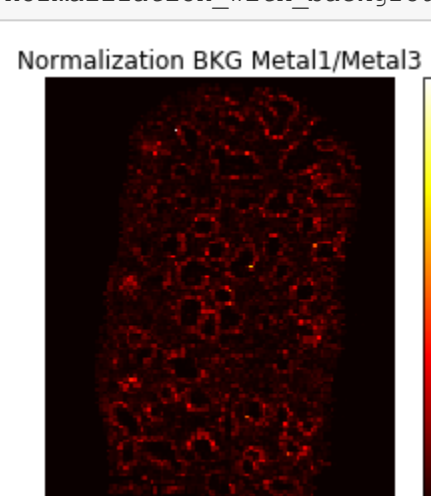

### k-means segmentation

Segmentation of the images using k-means clustering. This is without spatial awareness.

- metal\_segmentation\_index = integer, index of the metal used for segmentation. In this example we use Fe and the index of Fe in the reconstructed data corresponds to 2
- clusters = integer, number of clusters to perform k-means segmentation. For this particular common example we had determined that the ideal number of clusters is 2

```
In [15]: metal_segmentation_index = 2
segmentation_clusters = 2

label_image, segmented_image = segmentation(final_matrices, background_mask, metal_segmentation_index, segmentation_clusters)
```

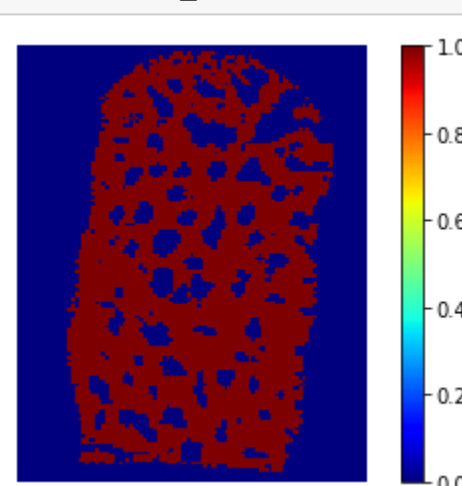

### k-means multimetal segmentation with neighboring pixel evaluation

Application of neighboring pixel evaluation using average filtering. The k-means segmentation part of the code should be run first before performing neighboring pixel evaluation. The number of clusters and metal segmentation index are the ones specified in the k-means segmentation part of the code. If the user wants to change these parameters, this can be done in the k-means segmentation part of the code. No inputs are required here by the user

Multimetal segmented images correspond to the segmented images using Fe and the background mask (Zn) for segmentation. A weighted image corresponds to the image after filtering to determine the tissue boundaries.

```
In [16]: weighted_pixels = neighbouring_average(label_image, background_mask)
```

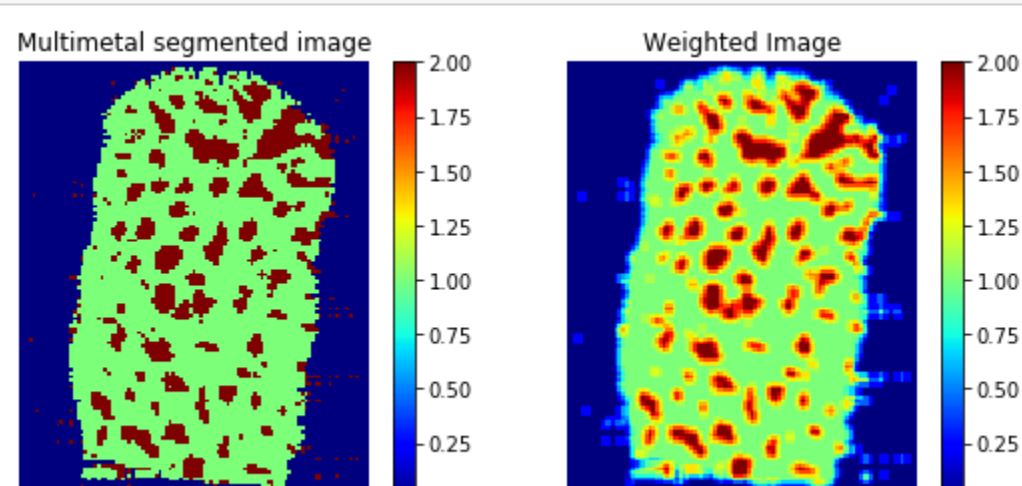

### Image masks of the segmented areas

It is possible to set up to four different areas determined by segmentation and neighboring pixel evaluation. It is necessary to set up the cutoffs of the areas in relation to the weighted image (0 to 18 scale). For this particular example we set up the cutoff values for:

Area 1 = Background (values between 0 and 5) Area 2 = Red Pulp (values between 6 and 10) Area 3 = Marginal zone (values between 11 and 14) Area 4 = White pulp (values between 15 and 18)

The variables shown should specify the low and high cutoff of a particular area:

- low\_A1 = integer, low cutoff of Area 1
- high\_A1 = integer, high cutoff of Area 1
- low\_A2 = integer, low cutoff of Area 2
- high\_A2 = integer, high cutoff of Area 2
- low\_A3 = integer, low cutoff of Area 3
- high\_A3 = integer, high cutoff of Area 3
- low\_A4 = integer, low cutoff of Area 4
- high\_A4 = integer, high cutoff of Area 4

```
In [17]: low_A1 = 0
high_A1 = 0.59

low_A2 = 0.60
high_A2 = 1.19

low_A3 = 1.20
high_A3 = 1.49

low_A4 = 1.50
high_A4 = 2.0

area1, area2, area3, area4 = image_masks(weighted_pixels, low_A1, high_A1, low_A2, high_A2, low_A3, high_A3, low_A4, high_A4)
```

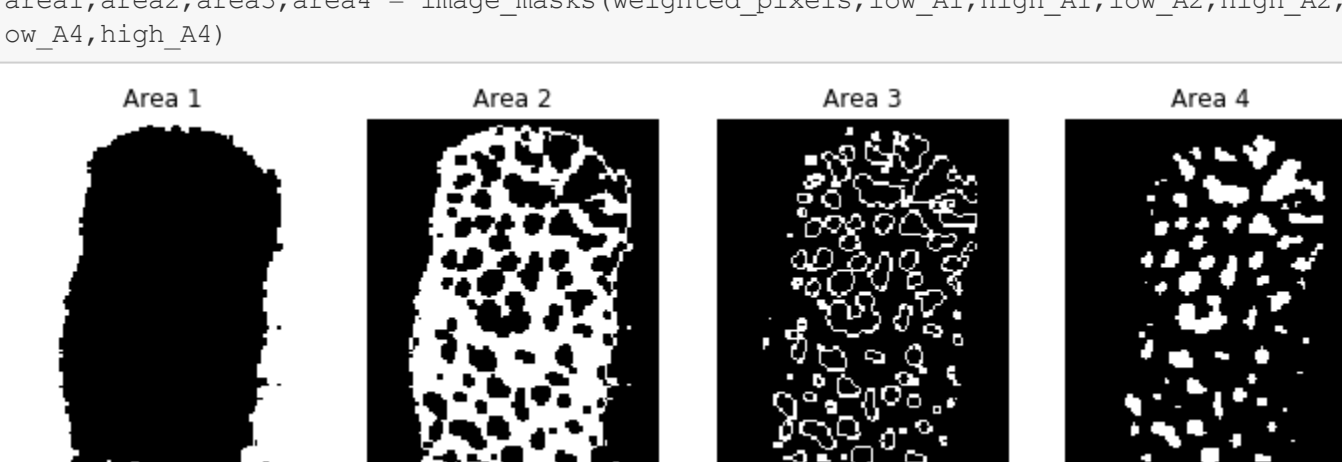

### Quantitation in different segments

Quantitation of pixels in the different segments determined by the image masks. Four different areas of a tissue were determined after segmentation. The segmented areas can be used to get the number of pixels in each of the particular areas, find the average and error of any of the metals in each of the segmented areas. It is necessary to choose the metal that we desire to quantify in each of the areas as the (quantitation\_index). In this particular example, we want to quantify the Bismuth (quantitation\_index=1) so the index needs to be set to the Bi index (Bismuth index is 1). It is also possible to quantify the average signal of any of the other metals, for example if we want to quantify the Fe in each of the segmented areas we should set (quantitation\_index=2) as the Fe corresponds to the metal with the index=2.

- quantitation\_index = int, index of the metal that we want to quantify in each of the segments

```
In [18]: quantitation_index = 2

quantitation_segments(final_matrices, area1, area2, area3, area4, quantitation_index)
```

```
Area 1 Quantitation:
Area 1 pixels are: 5308
Area 1 average is: 518.7432395475972
Area 1 error is: 7.172345137306754
```

```
Area 2 Quantitation:
Area 2 pixels are: 4822
Area 2 average is: 3890.3483368180314
Area 2 error is: 15.287243249381316
```

```
Area 3 Quantitation:
Area 3 pixels are: 1545
Area 3 average is: 2777.1852567092023
Area 3 error is: 23.262159826047085
```

```
Area 4 Quantitation:
```

```
import numpy as np
import matplotlib.pyplot as plt
import glob
import re
import warnings; warnings.simplefilter('ignore')
from sklearn.cluster import KMeans

global ldiscard
ldiscard=0

def atoi(text):
    """
        Natural Sorting of data: Functions used to organize the data in terms of
        type. Import the package re. Allow the use of
        backslashes to indicate special forms without evoking the special meaning.
        ↗

        atoi function:
            input = str, text
            output = str and int, text
    """
    return int(text) if text.isdigit() else text

def natural_keys(text):
    """
        alist.sort(key=natural_keys) sorts in human order
        http://nedbatchelder.com/blog/200712/human_sorting.html
        (See Toothy's implementation in the comments)
    """
    return [ atoi(c) for c in re.split('(\d+)', text) ]

def processfile(filename,ldiscard,spot_size,scan_rate):
    """
        Function processfile used to load and read the data in a single file

        Input:
            filename = str, name of the folder where the data files are stored
            ldiscard = integer, number of columns on the far left side of the image
            to be eliminated. Default value is 0
            ↗
            spot_size = integer, spot size in microns of the laser used to acquire
            the data
            ↗
            scan_rate = integer, scan rate of the laser in microns/second

        Output:
            new_matrix = nd array, reduced data summed by sumdata amounts
            sumdata = int, number of data points that make one pixel (depends on
            ↗
            laser spot size and scan rate)
    """
```

```
data_matrix = np.loadtxt(filename, delimiter=",", skiprows=(2+ldiscard))
pixel_time = spot_size/scan_rate
data_point_time = data_matrix[6,0]-data_matrix[5,0]
sumdata = int(round(pixel_time/data_point_time))
nrows = data_matrix.shape[0]//sumdata
ncols = data_matrix.shape[1]-1
new_matrix = np.zeros((nrows+1,ncols))
for n in range(nrows):
    new_matrix[n,:] = np.sum(data_matrix[n*sumdata:(n+1)*sumdata,1:],axis=0)

new_matrix[n+1,:] = np.sum(data_matrix[(n+1)*sumdata:,1:],axis=0)
return new_matrix, sumdata
```

```
def image_reconstruction
    (foldername,ldiscard,extension,ncolumns,spot_size,scan_rate):
    """
        Function image_reconstruction used for load files in a directory

        Input:
            foldername = str, folder in which the data files and script are located
            ldiscard = integer, number of columns on the far left side of the image
                to be eliminated. Default value is 0
            extension = str, extension of the data files
            ncolumns = int, number of columns in the reduced matrix (equal to the
                number of metals)
            spot_size = integer, spot size in microns of the laser used to acquire
                the data
            scan_rate = integer, scan rate of the laser in microns/second

        Output:
            final_matrices = dic, dictionary composed of np.arrays of the final
                data of different analyzed metals
            sumdata = int, number of data points that make one pixel (depends on
                laser spot size and scan rate)
    """
    files = glob.glob1(foldername,extension)
    files.sort(key=natural_keys)
    nfiles = len(files)
    dic_data = {}
    for n in range(ncolumns):
        dic_data[n]=[]
    for file in files:
        processed_matrix,sumdata = processfile(foldername
            +'/' +file,ldiscard,spot_size,scan_rate)
        for col in range(ncolumns):
            dic_data[col].append(processed_matrix[:,col])
    final_matrices={}
    for n in range(ncolumns):
```

```
    final_matrices[n]=np.array(dic_data[n])
    return final_matrices, sumdata
```

```
def write_data_analysis ↗
    (final_matrices,ldiscard,sumdata,nmetals,foldername='results'):
    """
        Function write_data_analysis use to write the processed data into separate ↗
        csv files

        Input:
            final_matrices = dic, dictionary composed of np.arrays of the final ↗
            data of different analyzed metals
            ldiscard = int, number of datapoints discarded in each of the files, if ↗
            needed
            sumdata = int, number of data points that make one pixel (depends on ↗
            laser spot size and scan rate)
            nmetals = int, number of metals analyzed, when performing the images

        Output:
            files for each of the analyzed metals written in .csv inside the / ↗
            results directory
    """
    dic_of_metals = {}
    keys = range(nmetals)
    for i in keys:
        dic_of_metals[i+1] = "Metal" + str(i+1)
    for metal in final_matrices:
        filename = foldername + "/Reconstruction-%s.xl" % (dic_of_metals[metal+1])
        np.savetxt(filename, final_matrices[metal], delimiter=',', newline='\n')

def generate_plot_all_metals(final_matrices,nmetals):
    """
        Function genetate_plot_all_metals to plot all the metal images in one plot

        Input:
            final_matrices = dic, dictionary composed of np.arrays of the final ↗
            data matrices of different analyzed metals
            nmetals = int, number of metals analyzed, when performing the images

        Output:
            matplotlib image of the analyzed metals in one image (in the Jupyter ↗
            notebook)
    """
    dic_of_metals = {}
    keys = range(nmetals)
    for i in keys:
        dic_of_metals[i+1] = "Metal" + str(i+1)
```

```
fig = plt.figure(figsize=[10,8])
for n in range(1,nmetals+1):
    ax = fig.add_subplot(2,2,n)
    plt.imshow(final_matrices[n-1], interpolation='None', cmap=plt.cm.hot)
    plt.title("%s" % dic_of_metals[n])
    plt.axis('off')
    plt.colorbar()
plt.show()
```

```
def generate_metal_plot(final_matrices,metal_index,nmetals):
```

```
    '''
```

```
        Function generate_metal_plot used to generate a plot of one metal
```

```
    Input:
```

```
        final_matrices = dic, dictionary composed of np.arrays of the final      ↗
            data matrices of different analyzed metals
        metal_index = int, index of the specified metal in the dictionary (1 to ↗
            nmetals)
        nmetals = int, number of metals analyzed, when performing the images
```

```
    Output:
```

```
        matplotlib image of a particular metal inline
```

```
    '''
```

```
dic_of_metals = {}
keys = range(nmetals)
for i in keys:
    dic_of_metals[i+1] = "Metal" + str(i+1)
fig = plt.figure(figsize=[5,4])
ax = fig.add_subplot(1,1,1)
plt.imshow(final_matrices[metal_index-1], interpolation='None',      ↗
            cmap=plt.cm.hot)
plt.title("%s" % dic_of_metals[metal_index])
plt.axis('off')
plt.colorbar()
plt.show()
```

```
def populate_border(matrix):
```

```
    '''
```

```
        Function populate_border used to fine tune, delimitate border of the tissue ↗
            sample, based on any metal content. This function is
        concatenated with the remove_background function
```

```
    Input:
```

```
        matrix = np array, correspond to the matrix index_threshold. This is ↗
            the matrix that have the applied condition
        matrix < threshold, this matrix correspond to a boolean matrix which ↗
            have defined True and False values.
```

```

    Output:
    ...     border = np array
border = np.ones(matrix.shape)
for n in range(matrix.shape[0]):
    for m in range(matrix.shape[1]):
        if matrix[n, m] == True:
            border[n, m] = 0
        elif matrix[n, m] == False:
            break
for n in range(matrix.shape[0]):
    for m in range(matrix.shape[1]):
        if matrix[n, matrix.shape[1] - m - 1] == True:
            border[n, matrix.shape[1] - m - 1] = 0
        elif matrix[n, matrix.shape[1] - m - 1] == False:
            break
for m in range(matrix.shape[1]):
    for n in range(matrix.shape[0]):
        if matrix[n, m] == True:
            border[n, m] = 0
        elif matrix[n, m] == False:
            break
for m in range(matrix.shape[1]):
    for n in range(matrix.shape[0]):
        if matrix[matrix.shape[0] - n - 1, m] == True:
            border[matrix.shape[0] - n - 1, m] = 0
        elif matrix[matrix.shape[0] - n - 1, m] == False:
            break
return border

```

```
def remove_background(final_matrices, background_index, line, std_threshold):
```

```

    ...
    Function remove_background used to calculate the average and std of the
    background and set the theshold values

```

Input:

```

    matrix = np array, data matrix with the Zn data final_matrices
    [Zn_index]
    line = int, index of the line that will be used to perform the
    background calculation, usually 0
    tolerance_std = int, tolerance of the std, usually is 3

```

Output:

```

    ...     background_mask = np array, background mask of the image data
matrix = final_matrices[background_index-1]
average_col = np.mean(matrix[:, line-1])

```



```
std_col = np.std(matrix[:, line-1])
average_row = np.mean(matrix[line-1, :])
std_row = np.std(matrix[line-1, :])
if std_col < std_row:
    average = average_col
    std = std_col
else:
    average = average_row
    std = std_row
threshold = average + std_threshold*std
index_threshold = matrix < threshold
background_mask = populate_border(index_threshold)
return background_mask
```

```
def generate_background_plot(background_mask):
```

```
    """
    Function generate_background_plot used to generate a plot of the background
    mask

    Input:
        background_mask = np array, background mask of the image data

    Output:
        matplotlib inline image of the background mask
    """
    fig = plt.figure(figsize=[5,4])
    ax = fig.add_subplot(1,1,1)
    plt.imshow(background_mask, interpolation='None', cmap=plt.cm.hot)
    plt.title('Background mask')
    plt.axis('off')
    plt.show()
```

```
def normalization_with_background
```

```
(final_matrices, background_mask, metal_numerator, metal_denominator, vmin=None, vmax=
None, inter='None',
```

```
    foldername='results'):
```

```
    """
    Function normalization_with_background to divide two matrices (metal1/
    metal2), saved the data and plotted it inline

    Input:
        final_matrices = dic, dictionary composed of np.arrays of the final
        data matrices of different analyzed metals
        background_mask = np array, background mask of the image data
        metal_numerator = integer, index of the metal that will correspond to
        the metal numerator in the division operation
        metal_denominator = integer, index of the metal that will correspond to
```

the metal denominator in the division operation

Output:

file inside the results directory with the results of the  
metal\_numerator/metal\_denominator division  
matplotlib inline image of the metal\_numerator/metal\_denominator  
division

...

```
old_err_state = np.seterr(divide='raise')
ignored_states = np.seterr(**old_err_state)
fig = plt.figure(figsize=[5,4])
ax = fig.add_subplot(1,1,1)
division_background = (final_matrices[metal_numerator-1]/final_matrices
    [metal_denominator-1])*background_mask
division_background[np.isnan(division_background)] = 0
np.savetxt(foldername+'/Normalization-Background-Metal'+str(metal_numerator)
    +'-'+Metal'+str
    (metal_denominator),division_background,delimiter=',',newline='\n')
plt.imshow
    (division_background,interpolation=inter,vmin=vmin,vmax=vmax,cmap=plt.cm.hot)
plt.title('Normalization BKG '+Metal'+str(metal_numerator)+'/'+Metal'+str
    (metal_denominator))
plt.axis('off')
plt.colorbar()
plt.show()
```

def segmentation

(final\_matrices,background\_mask,metal\_segmentation\_index,segmentation\_clusters):

...

Function segmentation for the segmentation of the images using k-means  
clustering without filtering

Input:

final\_matrices = dic, dictionary composed of np.arrays of the final  
data matrices of different analyzed metals  
background\_mask = np array, background mask of the image data  
metal\_segmentation\_index = int, index of the metal used for  
segmentation.  
segmentation\_clusters = int, number of clusters to perform k-means  
segmentation.

Output:

label\_image = np array, segmented image with its labels  
segmented\_image = np array, segmented image with its centroids

...

```
metal_segmentation = final_matrices[metal_segmentation_index-1]*background_mask
rows = metal_segmentation.shape[0]
columns = metal_segmentation.shape[1]
```



```

metal_segmentation_vector = metal_segmentation.reshape(rows*columns, 1)
# specifies that kmeans will be applied with n-clusters
kmeans = KMeans(segmentation_clusters)
# Perform kmeans over metal_segmentation_vector
kmeans.fit(metal_segmentation_vector)
# Find cluster center associated with each data point
segmented_vector = kmeans.cluster_centers_[kmeans.predict
(metal_segmentation_vector)]
# Find labels associated with each cluster
centroids = np.sort(np.unique(segmented_vector))
labels = np.zeros(segmented_vector.shape)
for index, centroid in enumerate(centroids):
    labels[segmented_vector==centroid] = index
label_image = labels.reshape(rows, columns)
# Reshaped of the image, plotting and comparison with raw_data
segmented_image = segmented_vector.reshape(rows, columns)
# Image plot of the labels
plt.imshow(label_image, cmap='jet')
plt.colorbar()
plt.axis('off')
plt.show()
return label_image,segmented_image

```

```

def neighbouring_average(label_image,background_mask):
    """
        Function neighbouring_average for filtering the multimetal image

        Input:
            label_image = np array, segmented image with its labels
            background_mask = np array, background mask of the image data

        Output:
            weighted_pixels = np array, filtering of label image data
    """
    # Re-assignation of zero values
    label_image[label_image == 0] = 2
    # Differentiation of bacground using the background mask
    M = label_image*background_mask
    # Weighted pixel calculation
    weighted_pixels = np.zeros(M.shape)
    for n in range(1, M.shape[0]-1):
        for m in range(1, M.shape[1]-1):
            weighted_pixels[n, m]= (M[n-1,m-1] + M[n-1,m] + M[n-1,m+1] + M[n,m-1] +
                M[n,m] + M[n, m+1] + M[n+1, m-1] + M[n+1, m] + M[n+1, m+1])/9
    # Image generation of the multimetal segmentation
    plt.figure(figsize=(9, 4))
    ax1=plt.subplot(1, 2, 1)
    plt.imshow(M, cmap='jet')

```

```
plt.colorbar()
plt.axis('off')
plt.title('Multimetal segmented image')
# Image generation of the weighted image
ax1=plt.subplot(1, 2, 2)
plt.imshow(weighted_pixels, interpolation='none', cmap='jet')
plt.colorbar()
plt.axis('off')
plt.title('Weighted Image')
plt.show()
return weighted_pixels
```

```
def image_masks(weighted_pixels, low_A1, high_A1, low_A2, high_A2, low_A3, high_A3, low_A4, high_A4):
    '''
```

```
        Function image_masks to obtain the masks images of the segmented areas
```

```
    Input:
```

```
        low_A1 = integer, low cutoff of Area 1
        high_A1 = integer, high cutoff of Area 1
        low_A2 = integer, low cutoff of Area 2
        high_A2 = integer, high cutoff of Area 2
        low_A3 = integer, low cutoff of Area 3
        high_A3 = integer, high cutoff of Area 3
        low_A4 = integer, low cutoff of Area 4
        high_A4 = integer, high cutoff of Area 4
```

```
    Output:
```

```
        area1 = image of image mask of area 1
        area2 = image of image mask of area 2
        area3 = image of image mask of area 3
        area4 = image of image mask of area 4
```

```
    '''
```

```
area1 = (weighted_pixels <= high_A1)
area2 = (weighted_pixels <= high_A2) ^ (weighted_pixels <= low_A2)
area3 = (weighted_pixels <= high_A3) ^ (weighted_pixels <= low_A3)
area4 = (weighted_pixels <= high_A4) ^ (weighted_pixels <= low_A4)
# Image generation
plt.figure(figsize=(12, 9))
ax=plt.subplot(1, 4, 1)
plt.imshow(area1, cmap='gray')
plt.axis('off')
plt.title('Area 1')
ax=plt.subplot(1, 4, 2)
plt.imshow(area2, interpolation='none', cmap='gray')
plt.axis('off')
plt.title('Area 2')
ax=plt.subplot(1, 4, 3)
plt.imshow(area3, interpolation='none', cmap='gray')
```

```
plt.axis('off')
plt.title('Area 3')
ax=plt.subplot(1, 4, 4)
plt.imshow(area4, interpolation='none', cmap='gray')
plt.axis('off')
plt.title('Area 4')
plt.show()
return area1, area2, area3, area4
```

```
def quantitation_segments ↗
    (final_matrices, area1, area2, area3, area4, quantitation_index):
    """
        Function quantitation_segments to obtain the masks images of the segmented ↗
        areas

        Input:
            final_matrices = dic, dictionary composed of np.arrays of the final ↗
            data matrices of different analyzed metals
            area1 = image of image mask of area 1
            area2 = image of image mask of area 2
            area3 = image of image mask of area 3
            area4 = image of image mask of area 4
            quantitation_index = int, index of the metal that we want to quantify ↗
            in each of the segments

        Output:
            inline results of the averages, standard error and number of pixels of ↗
            the segmented areas
    """
    metal_quantitation = final_matrices[quantitation_index-1]
    # Area 1
    print ('Area 1 Quantitation:')
    pixels_A1 = len(metal_quantitation[ area1])
    avg_A1 = np.mean(metal_quantitation[ area1])
    error_A1 = np.std(metal_quantitation[ area1])/np.sqrt(pixels_A1)
    print ('Area 1 pixels are:', pixels_A1)
    print ('Area 1 average is:', avg_A1)
    print ('Area 1 error is:', error_A1)
    # Area 2
    print (' ')
    print ('Area 2 Quantitation:')
    pixels_A2 = len(metal_quantitation[ area2])
    avg_A2 = np.mean(metal_quantitation[ area2])
    error_A2 = np.std(metal_quantitation[ area2])/np.sqrt(pixels_A2)
    print ('Area 2 pixels are:', pixels_A2)
    print ('Area 2 average is:', avg_A2)
    print ('Area 2 error is:', error_A2)
    # Area 3
    print (' ')
```

```
print ('Area 3 Quantitation:')
pixels_A3 = len(metal_quantitation[ area3])
avg_A3 = np.mean(metal_quantitation[ area3])
error_A3 = np.std(metal_quantitation[ area3])/np.sqrt(pixels_A3)
print ('Area 3 pixels are:', pixels_A3)
print ('Area 3 average is:', avg_A3)
print ('Area 3 error is:', error_A3)
# Area 4
print (' ')
print ('Area 4 Quantitation:')
pixels_A4 = len(metal_quantitation[ area4])
avg_A4 = np.mean(metal_quantitation[ area4])
error_A4 = np.std(metal_quantitation[ area4])/np.sqrt(pixels_A4)
print ('Area 4 pixels are:', pixels_A4)
print ('Area 4 average is:', avg_A4)
print ('Area 4 error is:', error_A4)
```
